# Supplementary material for: Thermo-Responsive Polyion Complex of Polysulfobetaine and a Cationic Surfactant in Water
Source: MDPI journal article supplement (doi:10.3390/polym14153171), 2022-08-03
Supplement: s1 [file s1]

## **Supporting information**

### **Thermo-responsive polyion complex of polysulfobetaine and a cationic surfactant in water**

Thu Thao Pham and Shin-ichi Yusa\*

Department of Applied Chemistry, Graduate School of Engineering, University of  
Hyogo, 2167 Shosha, Himeji, Hyogo 671-2280, Japan

\*Corresponding author

Shin-ichi Yusa

yusa@eng.u-hyogo.ac.jp

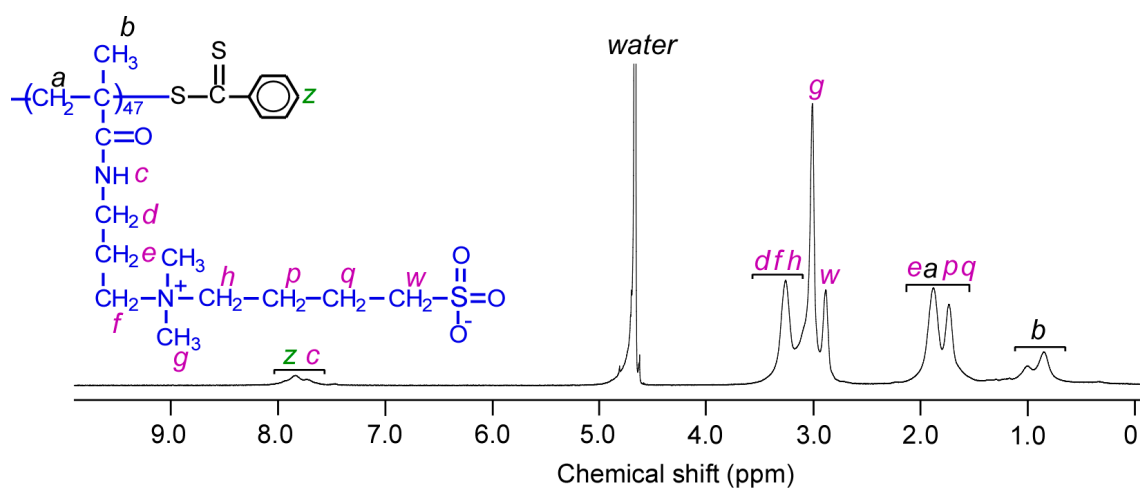

**Figure S1.**  $^1\text{H}$  NMR spectrum of PSBP in  $\text{D}_2\text{O}$  at  $25^\circ\text{C}$ .

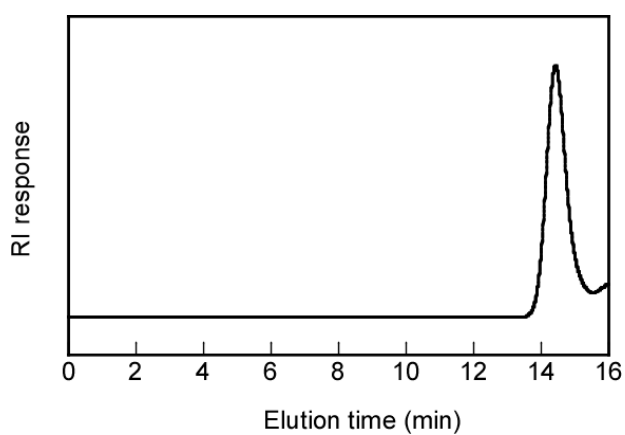

**Figure S2.** Gel-permeation chromatography (GPC) elution curve of PSBP obtained using a refractive index (RI) detector working at  $40^\circ\text{C}$  and phosphate buffer as an eluent.

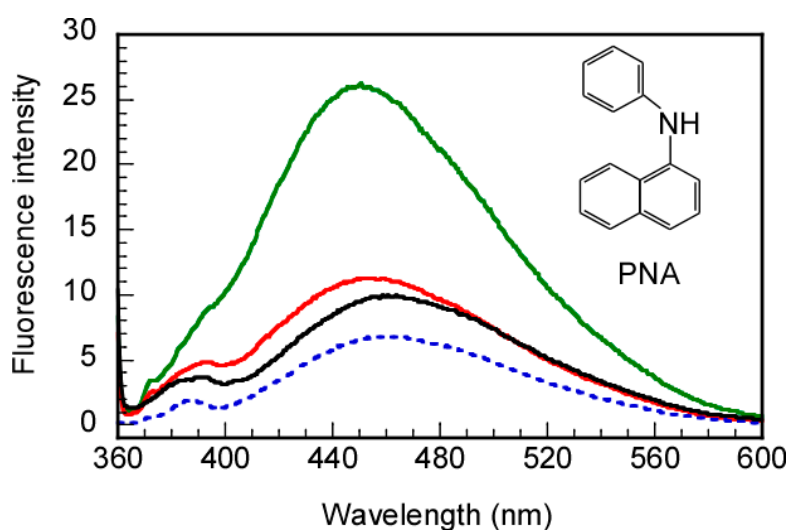

**Figure S3.** Fluorescence spectra of PNA only (---) and PNA in the presence of PSBP at a concentration of 0.5 g/L (—), CTAB at a concentration of 0.05 g/L (—), and PSBP/CTAB at a concentration of 0.084 g/L (—) in 0.1 M aqueous solutions.

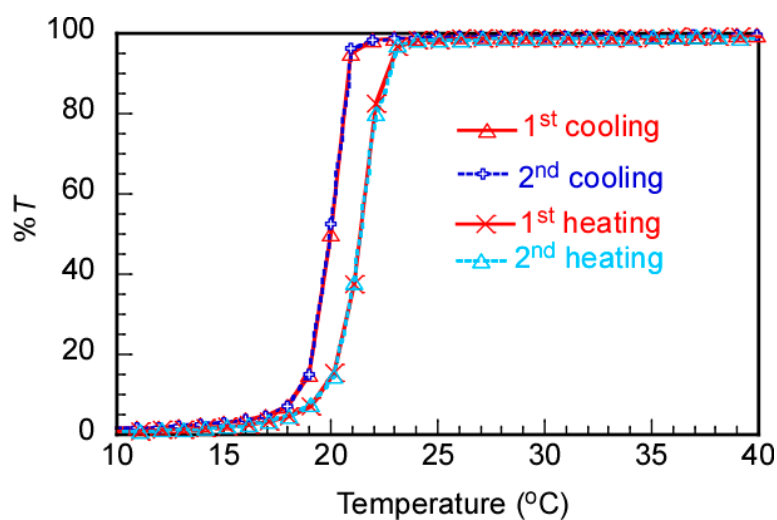

**Figure S4.** Percent transmittance (%T) of an aqueous PSBP at a concentration of 3.0 g/L as a function of temperature upon heating and cooling processes.

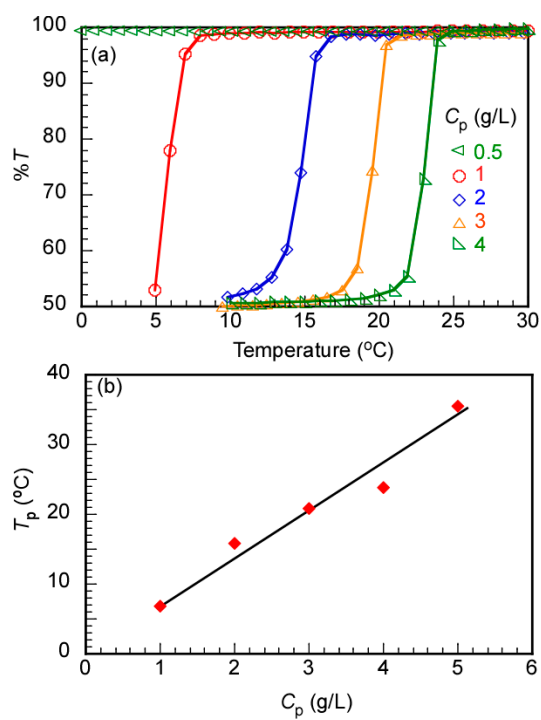

**Figure S5.** (a) Percent transmittance ( $\%T$ ) of aqueous PSBP solutions as a function of temperature at different polymer concentrations ( $C_p$ ) and (b)  $C_p$  dependence of the phase transition temperature ( $T_p$ ) of an aqueous PSPB solution.

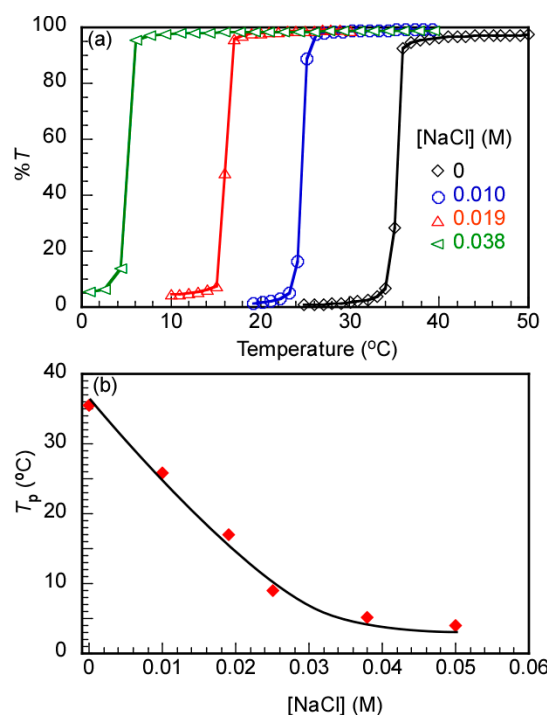

**Figure S6.** (a) Percent transmittance (% $T$ ) of aqueous PSBP solutions as a function of temperature at different NaCl concentration ([NaCl]) and (b) [NaCl] dependence of the phase transition temperature ( $T_p$ ) of an aqueous PSPB solution at a concentration of 5.0 g/L.

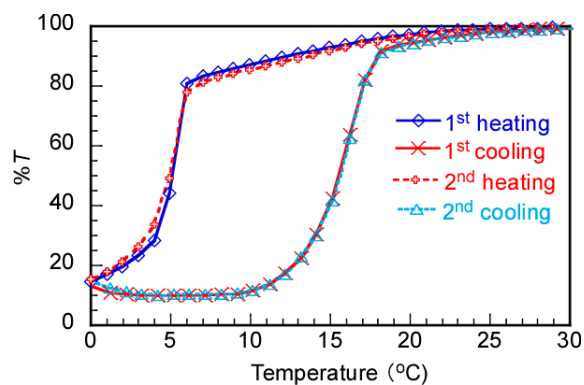

**Figure S7.** Percent transmittance (% $T$ ) of a 0.1 M NaCl aqueous PSBP/CTAB complex solution with a mixing ratio of 0.5 as a function of temperature upon heating and cooling processes at a complex concentration of 0.084 g/L.
